# Supplementary material
Source: PubMed Central journal article supplement (PMC3470913)
Supplement: NIHMS404644-supplement-ESI.pdf [file NIHMS404644-supplement-ESI.pdf]

## ***Supplementary Information for***

### **Photodynamic activity of viral nanoparticles conjugated with C<sub>60</sub>**

*Amy M. Wen,<sup>a</sup> Mary J. Ryan,<sup>a,d</sup> Alice C. Yang,<sup>a</sup> Kurt Breitenkamp,<sup>e</sup> Jonathan K. Pokorski,<sup>f</sup> Nicole F. Steinmetz<sup>a,b,c,\*</sup>*

<sup>a</sup> Department of Biomedical Engineering, <sup>b</sup> Radiology, <sup>c</sup> Materials Science and Engineering, <sup>f</sup> Macromolecular Sciences and Engineering, Case Western Reserve University, 10900 Euclid Avenue, Cleveland, OH 44106, USA, Tel: +1 216 368 5590

<sup>d</sup> Department of Chemical and Materials Engineering, School of Engineering, University of Dayton, Dayton, OH 45469

<sup>e</sup> Department of Chemistry, The Scripps Research Institute, 10550 North Torrey Pines Road, La Jolla, CA 92037

E-mail: [nicole.steinmetz@case.edu](mailto:nicole.steinmetz@case.edu), \* corresponding author

## Experimental Section

**Production of Q $\beta$ .** A pET28 plasmid containing the Q $\beta$  coat protein-encoding gene was used to transform *E. coli* cells. Intact Q $\beta$  virus-like particles were produced and purified using established procedures.<sup>1</sup> Virus concentration was determined using the modified Lowry assay (Pierce), and particle integrity was determined by size exclusion chromatography. Yields obtained were 25 mg Q $\beta$  per L cell culture.

**Bioconjugation procedures.** Q $\beta$  was modified with Oregon Green 488 (O488, Invitrogen) and C<sub>60</sub> at solvent-exposed surface Lys side chains. *N*-hydroxysuccinimide (NHS) ester chemistry was used to conjugate O488 and an azide ligation handle (azido (PEO)<sub>4</sub> propionic acid succinimidyl ester, Invitrogen) to Q $\beta$  (Scheme 1 in the manuscript). The reactions were carried out at a final concentration of 2 mg/mL Q $\beta$  in 0.1 M potassium phosphate buffer (pH 7.0) with 10% DMSO overnight at room temperature. A molar excess of 2000 and 1000 was used of O488 and azide, respectively. Particles were purified using 10 kDa molecular weight cut-off centrifugal filter units (Millipore), the product analyzed using UV/vis spectroscopy, native and denaturing gel electrophoresis, and size exclusion chromatography (Figure 1 in the manuscript). The concentration of Q $\beta$  particles was determined using the modified Lowry assay. Recovery was approximately 50% from the starting material. Next, copper-catalyzed azide-alkyne cycloaddition (CuAAC) was used to conjugate a propargyl-O-PEG-C<sub>60</sub> derivative<sup>2</sup> (Scheme 1 in the manuscript). The reaction was carried out at a concentration of 1 mg/mL Q $\beta$  in 0.1 M potassium phosphate buffer (pH 7.0) using a molar excess of 250 propargyl-O-PEG-C<sub>60</sub> and aminoguanidine (at 5 mM in final solution), CuSO<sub>4</sub> (0.5 mM) with tris-(benzyltriazolylmethyl)amine (THTPA) (2 mM), and L-ascorbic acid (5 mM).<sup>3</sup> The reaction was carried out for 2 hours at room temperature, then purified by size exclusion chromatography (SEC) using a Superose6 column on the ÄKTA Explorer chromatography system (GE Healthcare) at a flow rate of 0.4 mL/min using 0.1 M potassium phosphate buffer (pH 7.0).

**Gel electrophoresis.** Native gel electrophoresis was performed using 1.2% agarose gels in 1x TBE buffer (45 mM Tris, 45 mM boric acid, 1.25 mM EDTA in MilliQ water) with 10  $\mu$ g of sample. Protein subunits were analyzed on denaturing 4–12% NuPAGE gels (Invitrogen) using 1x MOPS running buffer (Invitrogen) and 10  $\mu$ g of sample with LDS sample buffer and 4  $\mu$ L of  $\beta$ -mercaptoethanol to reduce disulfide bonds. The sample was then heated to 100°C for 5 minutes. After separation, the gel was photographed using AlphaImager (Biosciences) imaging system before and after staining with Coomassie Blue.

**Cell assays.** PC-3 cells (ATCC) were grown and maintained in F12 medium (Invitrogen) supplemented with 10% (v/v) heat inactivated fetal bovine serum (FBS) and 1% (v/v) penicillin-streptomycin at 37°C in a 5% CO<sub>2</sub> humidified atmosphere (all reagents were obtained from Gibco).

First, cell interactions were evaluated using confocal microscopy to assess whether conjugation of C<sub>60</sub> affected cellular uptake. PC-3 cells (15,000 cells/750  $\mu$ L F12/well) were grown for 24 h on glass coverslips placed in an untreated 24-well plate. The media was then replaced with 250  $\mu$ L of fresh F12 containing 5  $\mu$ g of Q $\beta$ -O488 and Q $\beta$ -O488-C<sub>60</sub> and incubated at 37°C, 5% CO<sub>2</sub> for 3 h. Post incubation, cells were washed thoroughly with sterile saline and incubated for another 3 h in 250  $\mu$ L of fresh medium. The cells were then fixed using 4% (v/v)

paraformaldehyde and 0.3% (v/v) glutaraldehyde in DPBS for 5 min. Cell membranes were stained using wheat germ agglutinin (WGA) conjugated with Alexa Fluor 555 (WGA-A555) (Invitrogen) at 1  $\mu\text{g/mL}$  in 5% goat serum (GS) (Invitrogen) in DPBS for 1 h. Cell nuclei were stained using 4',6-diamidino-2-phenylindole (DAPI) (MP Biomedicals) diluted 1:9500 in DPBS for 10 min. All steps were carried out in the dark at room temperature; in between each step the coverslips were washed 3x with DPBS. The coverslips were then mounted using Permount (Fisher) on glass slides and sealed using nail polish. Confocal images were obtained using Olympus FluoView<sup>TM</sup> FV1000 LSCM and data processed using ImageJ software.

Next, drug efficacy was tested using white light therapy. PC-3 cells (15,000 cells/100  $\mu\text{L}$  F12/well) were seeded in a treated 96 well plate for 24 h at 37°C and 5%  $\text{CO}_2$ . Triplicates of Q $\beta$ , C<sub>60</sub>, and Q $\beta$ -C<sub>60</sub> in 100  $\mu\text{L}$  of medium were added to live cells in increasing amounts, matching the concentrations of Q $\beta$  and C<sub>60</sub> to Q $\beta$ -C<sub>60</sub>, respectively. Following incubation for 3 h, the medium was removed, the cells were washed with saline, and 100  $\mu\text{L}$  of fresh medium was added. The cells were returned to the incubator for 24 h to allow bound particles to be internalized. A mirror was then used to reflect white light from a Proxima DP1000x projector onto the cells in a 6 by 8 in. rectangle at a dose of 2  $\text{mW/cm}^2$  (Figure 2B). The cells were irradiated for 1 h (6.4  $\text{J/cm}^2$ ). The cell plate was then incubated at 37°C for 96 h. Cell viability was measured using an XTT cell proliferation assay kit (ATCC). Cell viability data are shown in Figure 2C.

An XTT cell proliferation assay kit (ATCC) was used to assess cellular viability after light therapy. 50  $\mu\text{L}$  of the activated XTT solution was added to each well then the plate was incubated at 37°C and 5%  $\text{CO}_2$  for 2 hours. A Tecan Infinite 200 plate reader was used to measure absorbance at 450 and 630 nm. The specific absorbance was calculated as:  $A_{450 \text{ nm}} - A_{630 \text{ nm}}$  (media only blank). The % cell viability was then determined by normalizing to the dark cells only control.

## Supplementary Figures

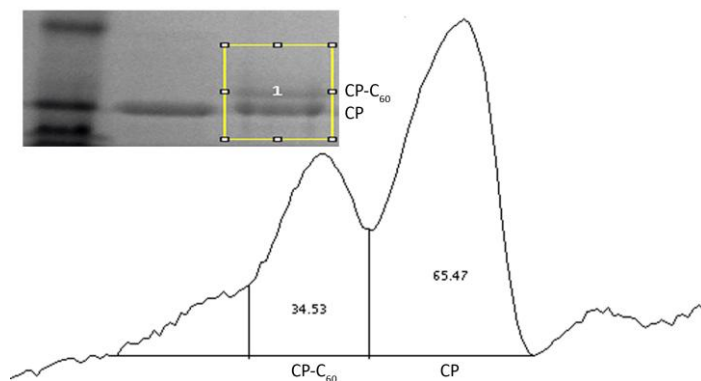

**Figure S1.** Protein band density analysis for quantification of C<sub>60</sub> attached per Q $\beta$  particle using ImageJ band analysis tool (<http://imagej.nih.gov/ij>). Inset shows lane being analyzed. The lower mobility band indicates covalent attachment of C<sub>60</sub>. Approximately a third of the possible 720 coat proteins of Q $\beta$  are labeled, resulting in an estimate of 60 $\pm$ 10% C<sub>60</sub> drugs attached. The error was approximated from the uncertainty in determining band boundaries as well as from analyzing multiple gels.

## References

- (1) Strable, E., Prasuhn, D.E., Jr., Udit, A.K., Brown, S., Link, A.J., Ngo, J.T., Lander, G., Quispe, J., Potter, C.S., Carragher, B., Tirrell, D.A., Finn, M.G. (2008). Unnatural amino acid incorporation into virus-like particles. *Bioconjug Chem* **19**: 866-875.
- (2) Steinmetz, N.F., Hong, V., Spoerke, E.D., Lu, P., Breitenkamp, K., Finn, M.G., Manchester, M. (2009). Buckyballs meet viral nanoparticles: candidates for biomedicine. *J Am Chem Soc* **131**(47): 17093-17095.
- (3) Hong, V., Presolski, S.I., Ma, C., Finn, M.G. (2009). Analysis and optimization of copper-catalyzed azide-alkyne cycloaddition for bioconjugation. *Angew Chem Int Ed Engl* **48**(52): 9879-9883.
